# Supplementary material for: Inhibition of NF-κB in astrocytes is sufficient to delay neurodegeneration induced by proteotoxicity in neurons
Source: Springer Nature journal article supplement (doi:10.1186/s12974-018-1278-2), 2018-09-11
Supplement: MOESM2 [file 16114196]

control

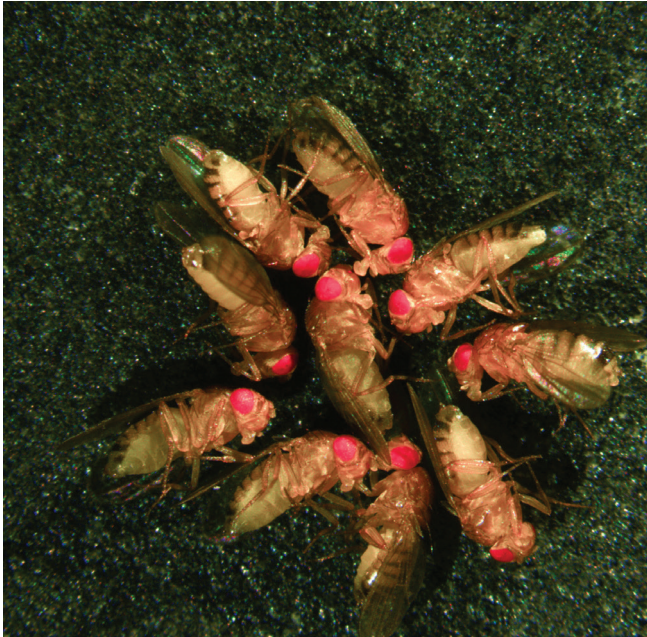

SCA3<sup>polyQ27</sup>

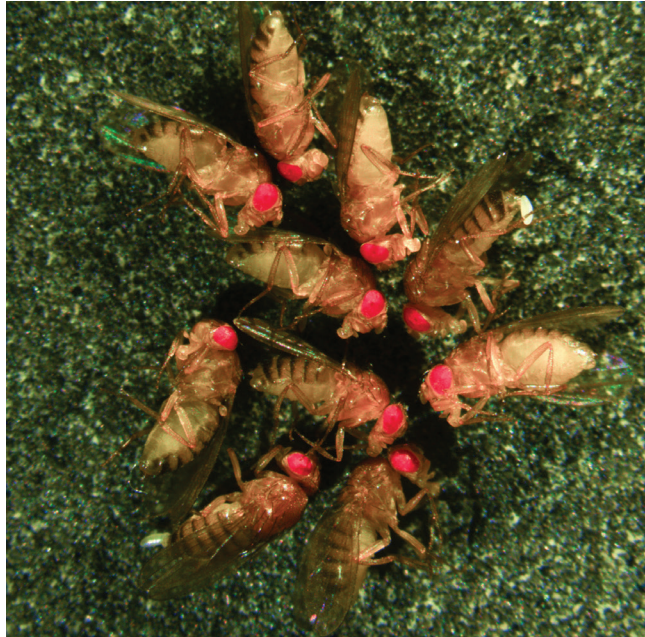

SCA3<sup>polyQ78</sup>

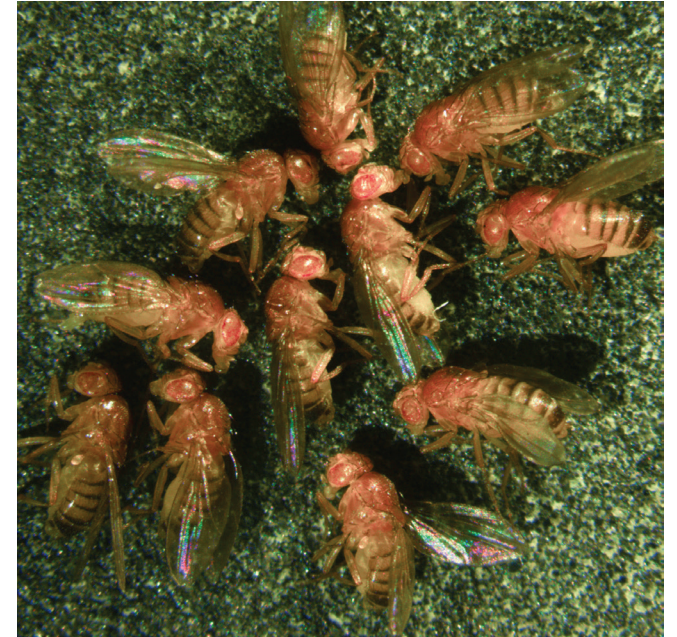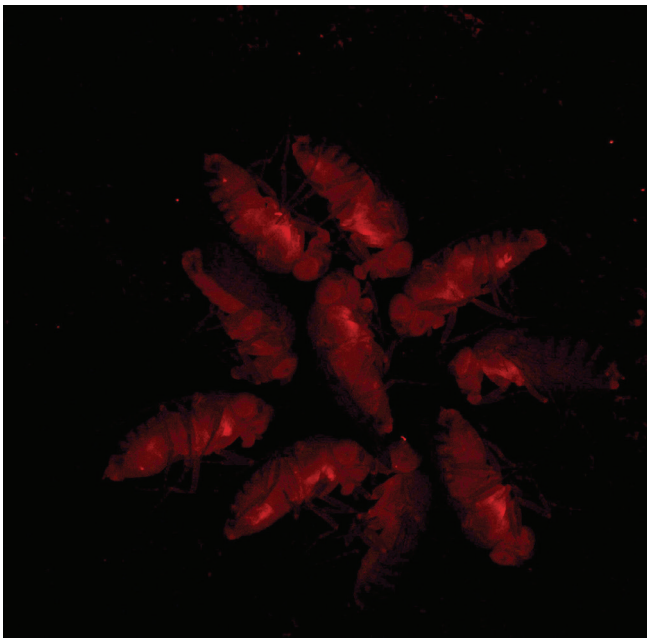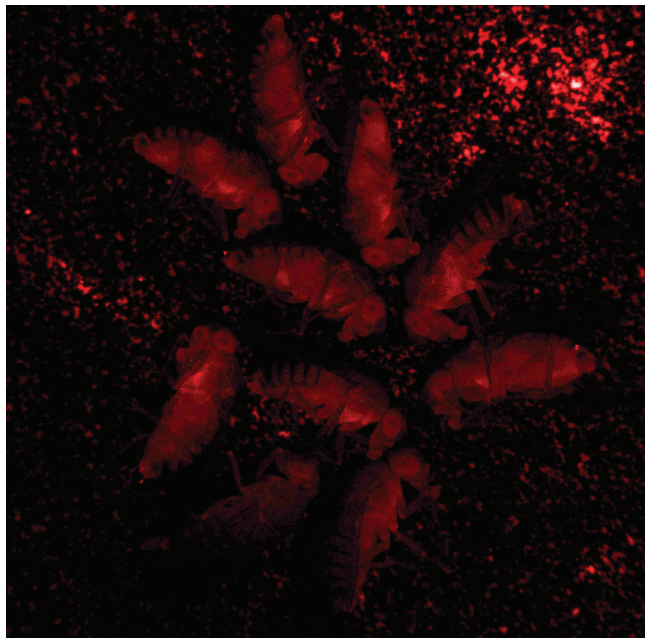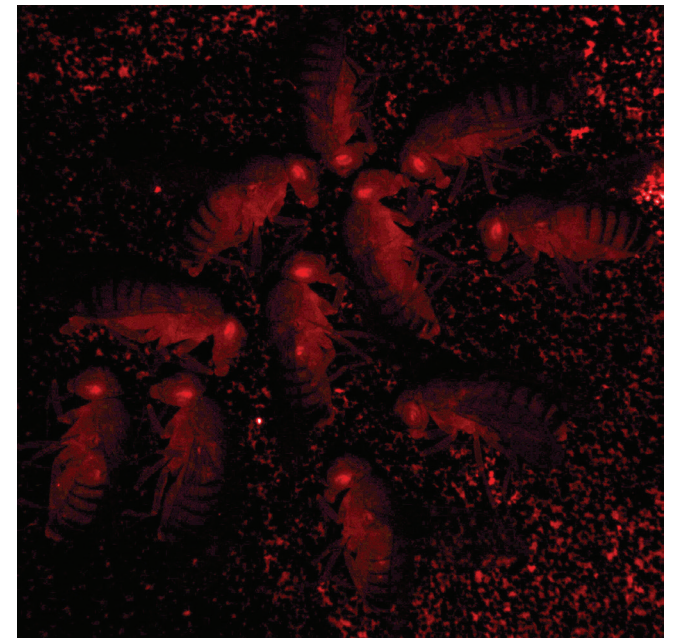

RFP (astrocytes)
