# Supplementary material for: Inhibition of NF-κB in astrocytes is sufficient to delay neurodegeneration induced by proteotoxicity in neurons
Source: Springer Nature journal article supplement (doi:10.1186/s12974-018-1278-2), 2018-09-11
Supplement: MOESM3 [file 16114196]

| Signaling          |         |                   |
|--------------------|---------|-------------------|
| gene               |         | VDRC stock number |
| CG17336, Lcch3     | 212,48% | 109606-KK         |
| CG6378, SPARC      | 168,48% | 100566-KK         |
| CG8394, VGAT       | 141,03% | 103586-KK         |
| CG18176, defl      | 117,46% | 20604-GD          |
| CG16827, ItgaPS4   | 109,47% | 109783-KK         |
| CG3143, foxo       | 103,78% | 107786-KK         |
| CG3408             | 101,19% | 36306-GD          |
| CG3022, GABA-B-R3  | 91,30%  | 108036-KK         |
| CG6357             | 82,35%  | 8782-GD           |
| CG10997, Cltc      | 81,09%  | 105975-KK         |
| CG3173, IntS1      | 74,74%  | 25825-GD          |
| CG5195, atk        | 74,74%  | 100110-KK         |
| CG5372, ItgaPS5    | 73,21%  | 100120-KK         |
| CG10233, rtp       | 76,06%  | 109000-KK         |
| CG4845, psidin     | 73,67%  | 103558-KK         |
| CG4641, nwk        | 71,63%  | 102133-KK         |
| CG17262, cnir      | 70,19%  | 104009-KK         |
| CG8639, Cirl       | 63,66%  | 100749-KK         |
| CG8909             | 62,50%  | 108629-KK         |
| CG8250, Alk        | 58,89%  | 107083-KK         |
| CG7449, hbs        | 55,33%  | 105913-KK         |
| CG1411, CRMP       | 55,33%  | 101510-KK         |
| CG11335, lox       | 53,95%  | 107435-KK         |
| CG4604, Glaz       | 52,65%  | 107433-KK         |
| CG42611, mgl       | 50,00%  | 105071-KK         |
| CG31221            | 48,37%  | 103017-KK         |
| CG15274, GABA-B-R1 | 47,15%  | 105863-KK         |
| CG34399, Nox       | 46,27%  | 100753-KK         |
| CG9453, Spn42Da    | 44,36%  | 106306-KK         |
| CG18870            | 40,09%  | 100135-KK         |
| CG11303, TM4SF     | 36,76%  | 8847-GD           |
| CG17800, Dscam1    | 33,73%  | 108835-KK         |
| CG7446, Grd        | 33,14%  | 5329-GD           |
| CG2736             | 32,95%  | 102672-KK         |
| CG6692, Cp1        | 32,62%  | 110619-KK         |
| CG8434, lbk        | 32,44%  | 106679-KK         |
| CG31094, LpR1      | 32,41%  | 106364-KK         |
| CG13984            | 29,91%  | 101831-KK         |
| CG42613            | 29,26%  | 102823-KK         |
| CG11217, CanB2     | 25,08%  | 104370-KK         |
| CG3131, Duox       | 24,36%  | 2593-GD           |
| CG10537, Rdl       | 24,26%  | 100429-KK         |
| CG33126, Nlaz      | 24,26%  | 101321-KK         |
| CG34370            | 22,97%  | 100162-KK         |
| CG6072, Sra        | 22,75%  | 107573-KK         |
| CG4280, crq        | 22,54%  | 45883-GD          |
| CG34385, dpr12     | 21,57%  | 44741-GD          |
| CG33950, trol      | 20,00%  | 110494-KK         |
| CG7586, Mcr        | 19,17%  | 100197-KK         |
| CG4636, SCAR       | 18,93%  | 21908-GD          |
| CG4167, Hsp67Ba    | 18,74%  | 104341-KK         |
| CG7000, snmp1      | 17,00%  | 104210-KK         |
| CG4096             | 16,04%  | 109025-KK         |
| CG4168             | 13,91%  | 100080-KK         |
| CG7228, pes        | 9,55%   | 100391-KK         |
| CG31094, LpR1      | 8,73%   | 106364-KK         |
| CG4821, teq        | 8,33%   | 15362-GD          |
| CG31619, nolo      | 6,12%   | 104736-KK         |
| CG6817, foi        | 6,05%   | 10102-GD          |
| CG1804, Kek6       | 2,52%   | 109681-KK         |
| CG12079, ND-30     | 1,67%   | 103412-KK         |
| CG18525, Spn88Ea   | -1,81%  | 28340-GD          |
| CG14162, dpr6      | -5,38%  | 103521-KK         |
| CG12004            | -5,52%  | 101732-KK         |
| CG33087, LRP1      | -10,78% | 109605-KK         |
| CG4545, SerT       | -11,71% | 11346-GD          |
| CG30361, mtt       | -12,63% | 102982-KK         |
| CG9623, if         | -13,39% | 100770-KK         |
| CG1618, comt       | -13,80% | 105552-KK         |
| CG8942, NimC1      | -15,18% | 105799-KK         |
| CG10590, TM9SF3    | -21,85% | 110679-KK         |
| CG7052, Tep2       | -23,67% | 106997-KK         |
| CG1632             | -24,42% | 106107-KK         |
| CG8743, Trpml      | -25,44% | 108088-KK         |
| CG11372, galectin  | -30,71% | 107054-KK         |
| CG1358             | -34,35% | 101453-KK         |
| CG7509             | -40,55% | 51584-GD          |
| CG30040, jeb       | -43,48% | 103047-KK         |
| CG8329             | -45,83% | 101603-KK         |
| CG18525, Spn88Ea   | -45,83% | 28340-GD          |
| CG31092, LpR2      | -48,30% | 107597-KK         |
| CG1771, mew        | -50,51% | 109608-KK         |
| CG2086, drpr       | -51,37% | 4833-GD           |
| CG6706, GABA-B-R2  | -63,53% | 1785-GD           |
| CG42610, Fhos      | -63,53% | 34035-GD          |
| CG7563, CalpA      | -67,89% | 101294-KK         |
| CG1732, Gat        |         | 106638-KK         |
| CG6378, SPARC      |         | 16678-GD          |
| CG4099, Sr-CI      |         | 110014-KK         |
| CG8095, scb        |         | 100949-KK         |

| Immunity            |         |                   |
|---------------------|---------|-------------------|
| gene                |         | VDRC stock number |
| CG7121, Tehao       | 80,14%  | 109705-KK         |
| CG5528, Toll-9      | 66,80%  | 109635-KK         |
| CG9681, PGRP-SB1    | 58,00%  | 101298-KK         |
| CG43119, Ect4       | 54,79%  | 102044-KK         |
| CG7250, Toll-6      | 46,77%  | 27103-GD          |
| CG7250, Toll-6      | 42,69%  | 928-GD            |
| CG6531, wgn         | 41,70%  | 9152-GD           |
| CG5490, Tl          | 38,64%  | 100078-KK         |
| CG6794, Dif         | 25,97%  | 100537-KK         |
| CG4432, PGRP-LC     | 12,80%  | 101633-KK         |
| CG6667, dl          | 7,23%   | 45996-GD          |
| CG1857, nec         | 0,17%   | 108366-KK         |
| CG4437, PGRP-LF     | -3,68%  | 108313-KK         |
| CG3048, Traf4       | -4,02%  | 110766-KK         |
| CG12919, egr        | -8,27%  | 108814-KK         |
| CG13422, GGBP-like3 | -8,82%  | 107358-KK         |
| CG5008, GGBP3       | -17,65% | 37256-GD          |
| CG12489, dnr1       | -20,49% | 106453-KK         |
| CG33717, PGRP-LD    | -21,00% | 51023-GD          |
| CG7486, Dredd       | -23,20% | 104726-KK         |
| CG6134, spz         | -24,69% | 105017-KK         |
| CG11992, Rel        | -30,75% | 49414-GD          |
| CG14746, PGRP-SC1a  | -33,00% | 43201-GD          |
| CG6890, Tollo       | -33,90% | 27099-GD          |
| CG43119, Ect4       | -44,57% | 105369-KK         |
| CG14928, SPZ-4      | -45,35% | 7679-GD           |
| CG8896, 18w         | -46,49% | 963-GD            |
| CG6890, Tollo       | -49,84% | 9431-GD           |
| CG8995, PGRP-LE     | -51,14% | 108199-KK         |
| CG11992, Rel        | -56,70% | 49413-GD          |
| CG11709, PGRP-SA    | -57,00% | 5594-GD           |

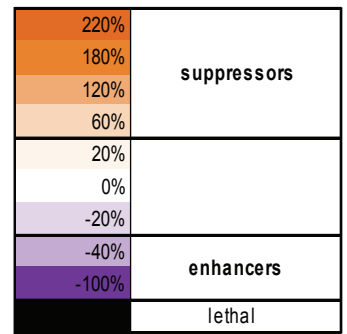

| Neuropeptides and Neuropeptide receptors |         |                   |
|------------------------------------------|---------|-------------------|
| gene                                     |         | VDRC stock number |
| CG14358, CCHa1                           | 156,06% | 104974-KK         |
| CG13758, Pdfr                            | 85,75%  | 106381-KK         |
| CG7665, Lgr1                             | 77,92%  | 104877-KK         |
| CG14375, CCHa2                           | 73,21%  | 102257-KK         |
| CG14734, Tk                              | 63,59%  | 103662-KK         |
| CG8784, PK2-R1                           | 52,80%  | 103822-KK         |
| CG7105, Proc                             | 52,00%  | 102488-KK         |
| CG10342, NPF                             | 49,00%  | 108772-KK         |
| CG2872, AstA-R1                          | 46,70%  | 101395-KK         |
| CG10698, CrzR                            | 45,90%  | 108506-KK         |
| CG13480, LK                              | 44,00%  | 14091-GD          |
| CG6438, amon                             | 36,00%  | 110788-KK         |
| CG32540, CCKLR-17D3                      | 32,05%  | 102039-KK         |
| CG6456, Mip                              | 31,00%  | 106076-KK         |
| CG5811, Rya-R                            | 26,80%  | 103973-KK         |
| CG7395, sNPF-R                           | 25,90%  | 9379-GD           |
| CG1147, NPFR                             | 25,40%  | 9605-GD           |
| CG30340                                  | 24,10%  | 100088-KK         |
| CG13633, AstA                            | 20,50%  | 103215-KK         |
| CG13061, Nplp3                           | 16,00%  | 105584-KK         |
| CG40733, RYa                             | 15,48%  | 109264-KK         |
| CG7887, Tkr99D                           | 15,48%  | 43329-GD          |
| CG3302, Crz                              | 14,10%  | 102204-KK         |
| CG3441, Nplp1                            | 13,00%  | 14035-GD          |
| CG14593, CCHa2-R                         | 10,74%  | 100290-KK         |
| CG7285, AstC-R1                          | 1,30%   | 110739-KK         |
| CG13419, Burs                            | -1,00%  | 111063-KK         |
| CG10823, SIFaR                           | -11,80% | 1783-GD           |
| CG14575, CapaR                           | -12,41% | 105556-KK         |
| CG7285, AstC-R1                          | -14,41% | 13560-GD          |
| CG9918, PK1-R                            | -20,75% | 101115-KK         |
| CG8795, PK2-R2                           | -23,10% | 100927-KK         |
| CG6440, Ms                               | -27,00% | 108760-KK         |
| CG15520, capa                            | -28,00% | 41124-GD          |
| CG14919, AstC                            | -34,00% | 102735-KK         |
| CG6515, Tkr86C                           | -37,64% | 107090-KK         |
| CG33696, CNMaR                           | -40,00% | 101076-KK         |
| CG30106, CCHa1-R                         | -40,56% | 103055-KK         |
| CG11051, Nplp2                           | -54,00% | 15305-GD          |
