# Supplementary material for: Inhibition of NF-κB in astrocytes is sufficient to delay neurodegeneration induced by proteotoxicity in neurons
Source: Springer Nature journal article supplement (doi:10.1186/s12974-018-1278-2), 2018-09-11

Dif/ Dorsal-dependent gene expression

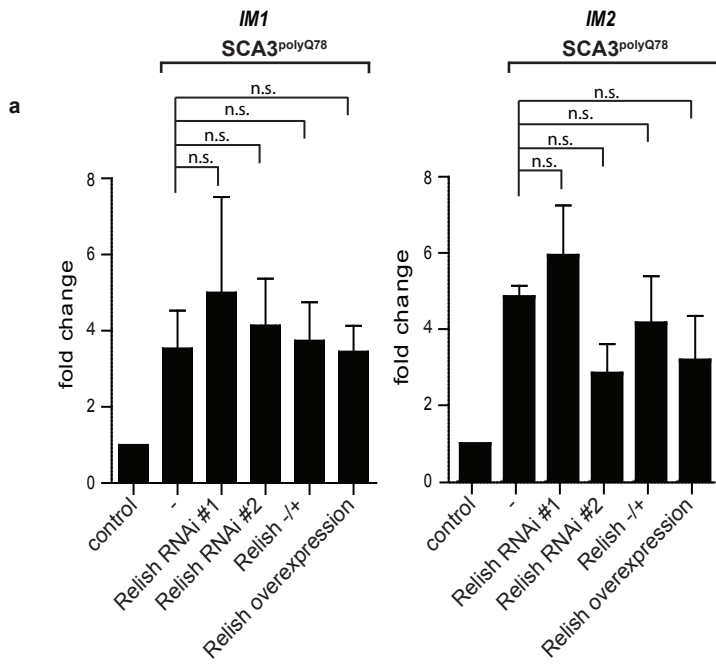

Supplement: MOESM5 [file 16114196]
