# Supplementary material for: Inhibition of NF-κB in astrocytes is sufficient to delay neurodegeneration induced by proteotoxicity in neurons
Source: Springer Nature journal article supplement (doi:10.1186/s12974-018-1278-2), 2018-09-11

**a**

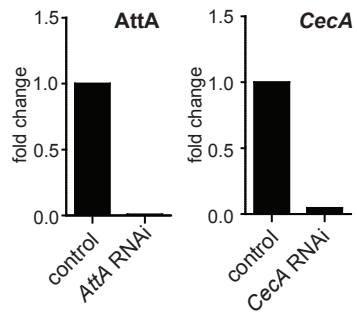

**b**

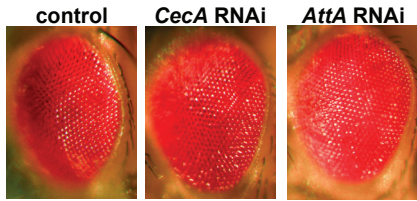

**c**

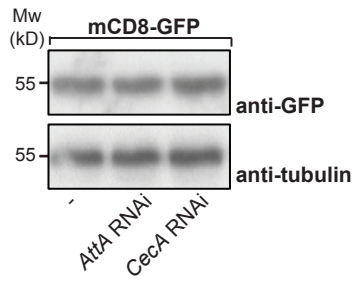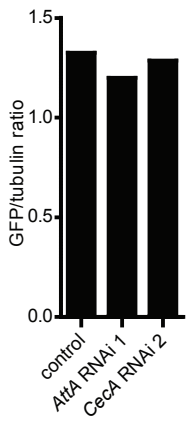

Supplement: MOESM6 [file 16114196]
